# Supplementary material for: Engineering triacylglycerol accumulation in duckweed (Lemna japonica)
Source: PubMed Central journal article supplement — Plant Biotechnol J. 2022 Nov 16;21(2):317–30. doi: 10.1111/pbi.13943 (PMC9884027; doi:10.1111/pbi.13943), 2022-11-16
Supplement: PBI-21-317-s002.pdf [file PBI-21-317-s002.pdf]

**Engineering Triacylglycerol  
Accumulation in Duckweed (*Lemna  
japonica*)**

**Supplemental materials**

(a)

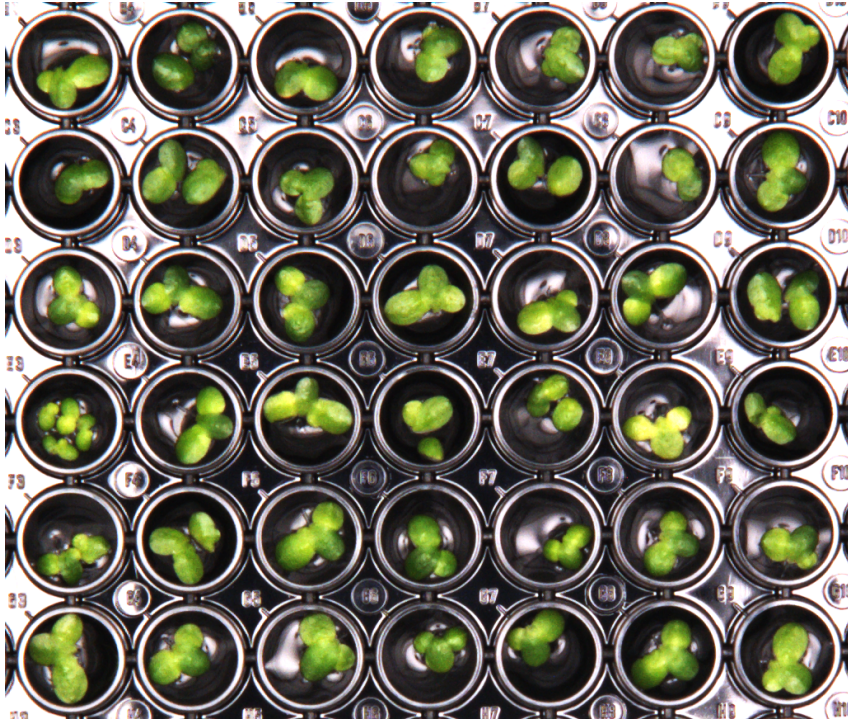

(b)

|                     |                      |                      |                      |                      |                      |                     |
|---------------------|----------------------|----------------------|----------------------|----------------------|----------------------|---------------------|
| <b>WT</b>           | <b>EV</b><br>(0-1)   | <b>EV</b><br>(0-2)   | <b>EV</b><br>(0-3)   | <b>EV</b><br>(0-4)   | <b>EV</b><br>(0-5)   | <b>WT</b>           |
| <b>EV</b><br>(0-6)  | <b>O</b><br>(6-1)    | <b>O</b><br>(6-2)    | <b>O</b><br>(6-3)    | <b>O</b><br>(6-4)    | <b>O</b><br>(6-5)    | <b>W</b><br>(22-1)  |
| <b>W</b><br>(22-2)  | <b>W</b><br>(22-3)   | <b>W</b><br>(22-4)   | <b>WT</b>            | <b>W</b><br>(22-7)   | <b>W</b><br>(22-9)   | <b>W</b><br>(22-10) |
| <b>D</b><br>(24-1)  | <b>D</b><br>(24-2)   | <b>D</b><br>(24-3)   | <b>WT</b>            | <b>D</b><br>(24-4)   | <b>OW</b><br>(25-1)  | <b>OW</b><br>(25-2) |
| <b>OW</b><br>(25-3) | <b>OW</b><br>(25-7)  | <b>OD</b><br>(27-2)  | <b>OD</b><br>(27-3)  | <b>OD</b><br>(27-4)  | <b>WD</b><br>(31-1)  | <b>WD</b><br>(31-3) |
| <b>WT</b>           | <b>OWD</b><br>(33-1) | <b>OWD</b><br>(33-3) | <b>OWD</b><br>(33-4) | <b>OWD</b><br>(33-5) | <b>OWD</b><br>(33-6) | <b>WT</b>           |

**Figure S1** Representative images of duckweed. (a) Different lines of duckweed in 96-well plate ready for fluorescence analysis using plate reader. (b) Names of lines in wells of the plate in (a). The number before dash line are represent as: 0 is for *EV*, 6 is for *SiOLE*(\*), 22 is for *CFP-AtWR11*, 24 is for *MmDGAT2*, 25 is for *SiOLE*(\*)+*CFP-AtWR11*, 27 is for *SiOLE*(\*)+*MmDGAT*, 31 is for *CFP-AtWR11*+*MmDGAT*, 33 is for *SiOLE*(\*)+*CFP-AtWR11*+*MmDGAT*. Different lines were also indicated by different colors.



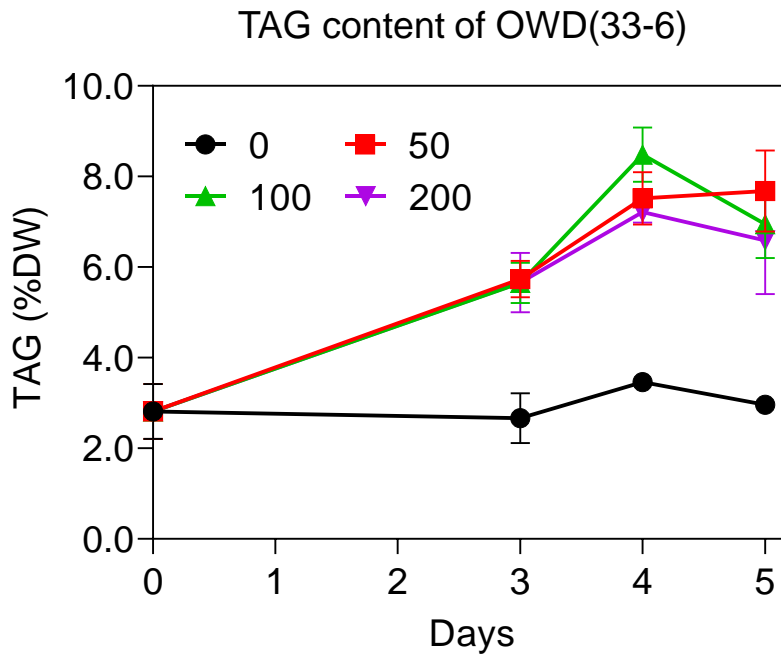

**Figure S3** TAG accumulation in duckweed treated with different concentrations of estradiol for different time periods. OWD (33-6) ((*SiOLE*(\*)+*XVE:CFP-AtWRI1*+*MmDGAT2*) transgenic line was used in this experiment. Fronds were cultivated in half-strength SH medium (pH 5.6) under continuous cool white fluorescent light illumination (approximate 100  $\mu\text{mol}\cdot\text{m}^{-2}\cdot\text{s}^{-1}$ ) at 23 °C with ambient CO<sub>2</sub> level.

Data are means of three biological replicates and error bars indicate standard deviations. Significant differences between groups ( $P < 0.05$ ) as identified by one-way ANOVA and Tukey's multiple comparisons test are shown by different letters.

(a)

A 154 T 119 C 233 G 181 | GC%: 60% | Length: 687

>CFP

```
TTCTCGAGGCCGATGGCCCTGTCCAACAAGTTCATCGGGGACGACATG
AAGATGACGTACCACATGGACGGGTGCGTGAACGGGCACTACTTCACC
GTGAAGGGCGAAGGCTCCGGGAAGCCGTATGAAGGGACCCAGACCTC
CACCTTCAAGGTGACCATGGCCAATGGGGGGCCCTCGCTTTCAGCTT
CGACATCCTCAGCACCGTGTTTCATGTACGGGAACAGATGCTTCACCGCC
TACCCGACGAGCATGCCCGATTACTTCAAGCAAGCCTTCCCCGACGGC
ATGTCCTACGAACGCACCTTCACCTACGAAGATGGCGGGGTGGCTACC
GCTAGCTGGGAGATCTCCCTCAAGGGCAACTGCTTCGAGCACAAGTCC
ACCTTCCACGGCGTCAATTTCCCCGCTGACGGCCCCGTGATGGCCAAG
AAAACCACCGGCTGGGACCCCAGCTTCGAGAAGATGACCGTGTGCGAC
GGCATTCTGAAGGGCGACGTCACCGCTTTCCTCATGCTCCAAGGCGGG
GGCAACTACCGCTGCCAGTTCCATACCTCCTACAAGACGAAGAAGCCC
GTGACCATGCCCCCGAACCACGTGGTTCGAGCACCGCATCGCCAGAACC
GATCTCGATAAGGGCGGCAACTCCGTGCAACTCACCGAGCACGCTGTG
GCTCACATCACCTCCGTCGTCCCCTTC
```

(b)

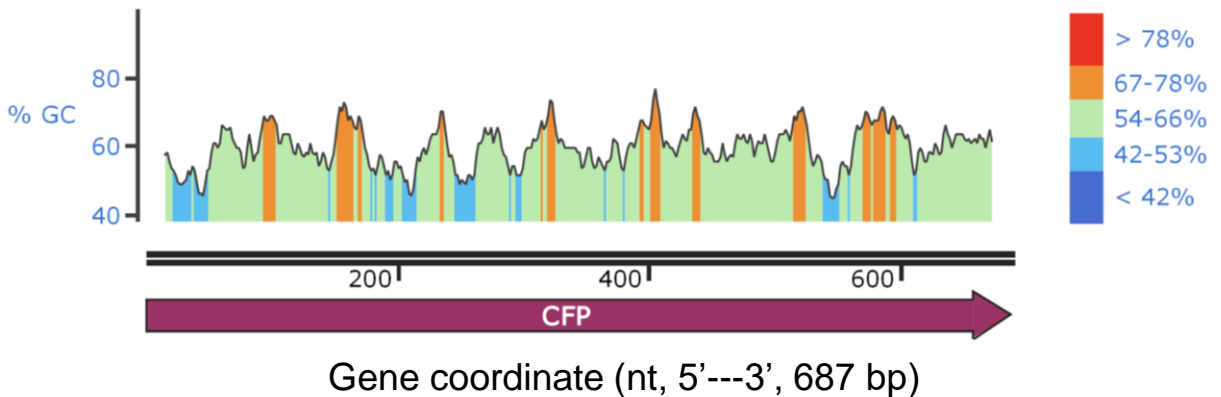

**Figure S4** Sequence and feature of optimized *CFP*. (a) gene sequence of *CFP* without stop codon, the start codon ATG showing as orange color, with N-terminal fusion of Kozak sequence. Exempt the Kozak sequence and stop codon, the total length of *CFP* is 687 bp, with 60% of average GC content. (b) Distribution of GC content in *CFP* scanned by 25-nt sliding windows. The total range for colors are 37%, and the midpoint for colors were 60%.

**Table S1:** TAG content as percent (DW) in WT and different transgenic lines of *Lemna japonica*. D, DGAT1; EV, empty vector; W, WRI1. The values shown for each biological replicate are averages for two independent transgenic lines.

| Biological replicate             | Genotype / condition |                 |                 |                 |                 |                 |                 |                 |
|----------------------------------|----------------------|-----------------|-----------------|-----------------|-----------------|-----------------|-----------------|-----------------|
|                                  | EV                   | O               | W               | D               | OW              | OD              | WD              | OWD             |
| A1                               | 0.08                 | 0.10            | 0.57            | 0.58            | 0.63            | 3.41            | 1.50            | 6.99            |
| A2                               | 0.08                 | 0.10            | 0.45            | 0.53            | 0.50            | 3.06            | 1.24            | 6.77            |
| A3                               | 0.09                 | 0.10            | 0.70            | 0.63            | 0.76            | 3.76            | 1.76            | 7.22            |
| B1                               | 0.08                 | 0.09            | 0.47            | 0.20            | 0.55            | 3.86            | 2.59            | 8.68            |
| B2                               | 0.07                 | 0.08            | 0.47            | 0.18            | 0.51            | 3.65            | 2.14            | 8.13            |
| B3                               | 0.09                 | 0.11            | 0.48            | 0.22            | 0.59            | 4.07            | 3.03            | 9.24            |
| Average $\pm$ standard deviation | 0.08 $\pm$ 0.01      | 0.10 $\pm$ 0.01 | 0.52 $\pm$ 0.10 | 0.39 $\pm$ 0.21 | 0.59 $\pm$ 0.10 | 3.64 $\pm$ 0.36 | 2.04 $\pm$ 0.68 | 7.84 $\pm$ 1.00 |
